# Supplementary material
Source: Springer Nature journal article supplement (https://www.springermedizin.de/resource/supplementary/12879_2012_2149_MOESM2_ESM.pdf/9443762)

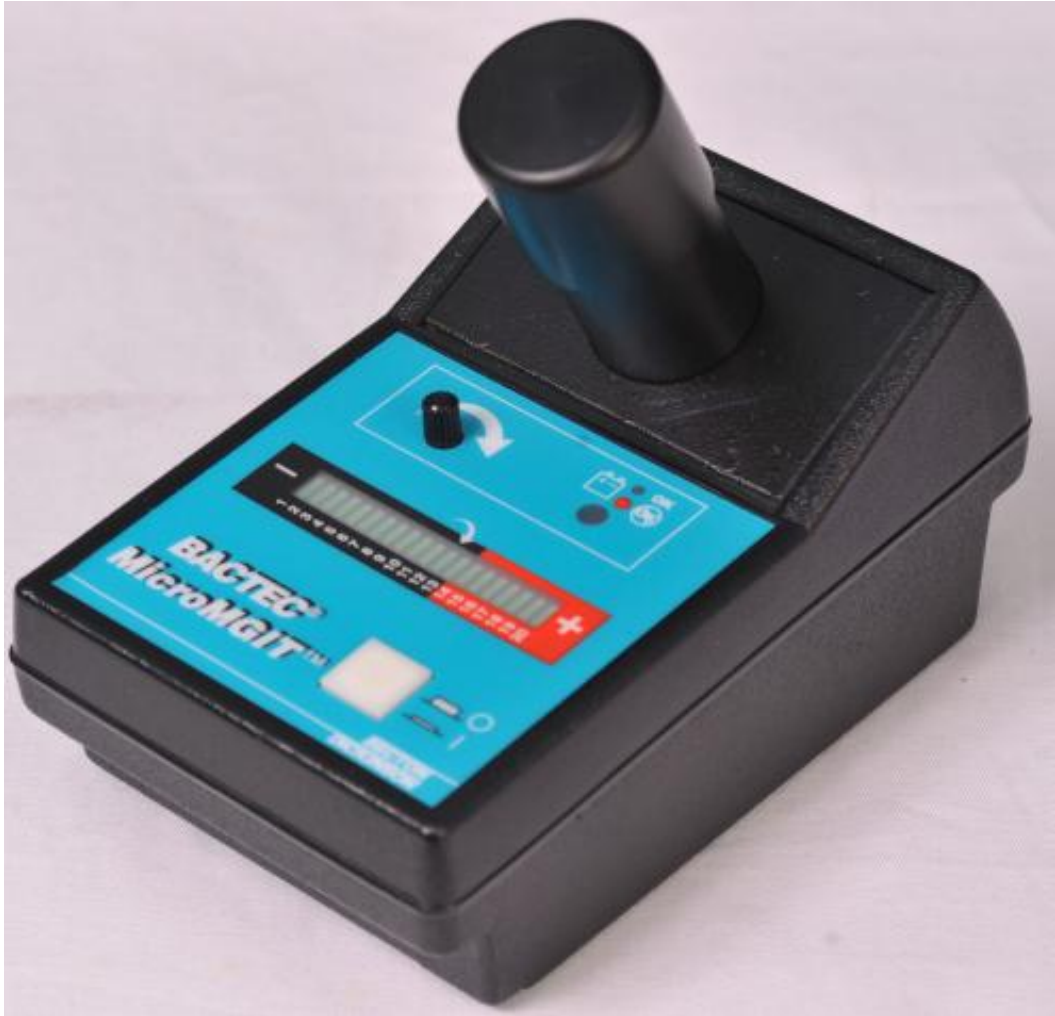

Supplement: MOESM2 [file 9443762]
